# Supplementary material for: The Top 100 Most Cited Articles on Platelet-Rich Plasma Use in Regenerative Medicine—A Bibliometric Analysis—From the ESSKA Orthobiologic Initiative
Source: MDPI journal article supplement (doi:10.3390/bioengineering9100580), 2022-10-19
Supplement: s1 [file s1]

**Table S2.** Modified Coleman Methodoloy Score (CMS) in top-100 and recent clinical studies.

|         |                                                                                                                                                                             | Part A - Only one score to be given for each of the sections |                       |                      |               |                     |                                  | Part B - Scores may be given for each option in each of the three sections if applicable |                                                             |                                               |                    |                                             |                                   |                                   |             |    |
|---------|-----------------------------------------------------------------------------------------------------------------------------------------------------------------------------|--------------------------------------------------------------|-----------------------|----------------------|---------------|---------------------|----------------------------------|------------------------------------------------------------------------------------------|-------------------------------------------------------------|-----------------------------------------------|--------------------|---------------------------------------------|-----------------------------------|-----------------------------------|-------------|----|
| Title   | First author                                                                                                                                                                | Study Size - number of injected site                         | Mean follow-up (mths) | PRP characterization | Type of study | Diagnosis certainty | 1. Outcome criteria              |                                                                                          | 2. Procedures for assessing outcomes                        |                                               |                    | 3. Description of subject selection process |                                   |                                   | Total Score |    |
|         |                                                                                                                                                                             |                                                              |                       |                      |               |                     | Outcome measures clearly defined | Timing of outcome assessment clearly stated                                              | Subjects recruited (results not taken from surgeons' files) | Investigator independent of surgeon /injector | Written assessment | Selection criteria reported and unbiased    | Recruitment rate reported : > 80% | Recruitment rate reported : < 80% |             |    |
| Top-100 | Platelet-rich plasma - Growth factor enhancement for bone grafts                                                                                                            | Marx                                                         | 10                    | 2                    | 7             | 15                  | 5                                | 2                                                                                        | 2                                                           | 3                                             | 0                  | 0                                           | 0                                 | 0                                 | 0           | 39 |
|         | Plasma rich in growth factors: Preliminary results of use in the preparation of future sites for implants                                                                   | Anitua                                                       | 4                     | 0                    | 7             | 15                  | 5                                | 0                                                                                        | 0                                                           | 3                                             | 0                  | 0                                           | 3                                 | 0                                 | 0           | 31 |
|         | Platelet-Rich Plasma Injection for Chronic Achilles Tendinopathy A Randomized Controlled Trial                                                                              | De Vos                                                       | 7                     | 0                    | 0             | 15                  | 5                                | 2                                                                                        | 2                                                           | 3                                             | 3                  | 3                                           | 3                                 | 0                                 | 0           | 27 |
|         | Treatment With Platelet-Rich Plasma Is More Effective Than Placebo for Knee Osteoarthritis A Prospective, Double-Blind, Randomized Trial                                    | Patel                                                        | 10                    | 0                    | 7             | 15                  | 5                                | 2                                                                                        | 2                                                           | 3                                             | 0                  | 3                                           | 3                                 | 0                                 | 0           | 37 |
|         | Platelet-rich plasma: intra-articular knee injections produced favorable results on degenerative cartilage lesions                                                          | Kon                                                          | 10                    | 2                    | 7             | 0                   | 5                                | 2                                                                                        | 2                                                           | 3                                             | 0                  | 3                                           | 3                                 | 0                                 | 0           | 24 |
|         | Platelet-Rich Plasma Intra-Articular Injection Versus Hyaluronic Acid Viscosupplementation as Treatments for Cartilage Pathology: From Early Degeneration to Osteoarthritis | Kon                                                          | 10                    | 0                    | 7             | 10                  | 5                                | 2                                                                                        | 2                                                           | 3                                             | 0                  | 3                                           | 3                                 | 0                                 | 0           | 32 |

|                                                                                                                                                                           |            |    |   |   |    |   |   |   |   |   |   |   |   |   |    |
|---------------------------------------------------------------------------------------------------------------------------------------------------------------------------|------------|----|---|---|----|---|---|---|---|---|---|---|---|---|----|
| The use of autologous platelet-rich plasma (platelet gel) and autologous platelet-poor plasma (fibrin glue) in cosmetic surgery                                           | Man        | 4  | 0 | 0 | 0  | 5 | 0 | 0 | 3 | 0 | 0 | 0 | 0 | 0 | 9  |
| Platelet-Rich Plasma Augmentation for Arthroscopic Rotator Cuff Repair<br>A Randomized Controlled Trial                                                                   | Castricini | 10 | 2 | 0 | 15 | 5 | 2 | 2 | 3 | 0 | 3 | 3 | 0 | 0 | 32 |
| Platelet gel for healing cutaneous chronic wounds                                                                                                                         | Crovetti   | 4  | 0 | 7 | 0  | 5 | 0 | 2 | 3 | 0 | 0 | 0 | 0 | 0 | 16 |
| Platelet rich plasma in arthroscopic rotator cuff repair: a prospective RCT study, 2-year follow-up                                                                       | Randelli   | 4  | 2 | 0 | 15 | 5 | 2 | 2 | 3 | 3 | 3 | 3 | 0 | 0 | 26 |
| A prospective, randomized, controlled trial of autologous platelet-rich plasma gel for the treatment of diabetic foot ulcers                                              | Driver     | 10 | 0 | 0 | 15 | 5 | 2 | 2 | 3 | 3 | 0 | 3 | 0 | 3 | 30 |
| Alveolar ridge and sinus augmentation utilizing platelet-rich plasma in combination with freeze-dried bone allograft: Case series                                         | Kassolis   | 0  | 2 | 7 | 0  | 5 | 2 | 2 | 3 | 0 | 0 | 0 | 0 | 0 | 14 |
| Platelet-rich plasma intra-articular knee injections for the treatment of degenerative cartilage lesions and osteoarthritis                                               | Filardo    | 10 | 2 | 7 | 0  | 5 | 2 | 2 | 3 | 0 | 3 | 3 | 0 | 0 | 24 |
| A Randomized Clinical Trial Evaluating Plasma Rich in Growth Factors (PRGF-Endoret) Versus Hyaluronic Acid in the Short-Term Treatment of Symptomatic Knee Osteoarthritis | Sanchez    | 10 | 0 | 0 | 15 | 5 | 2 | 2 | 3 | 0 | 3 | 3 | 0 | 0 | 30 |
| Platelet-rich plasma and bovine porous bone mineral combined with guided tissue regeneration in the treatment of intrabony defects in humans                              | Camargo    | 0  | 0 | 0 | 10 | 5 | 2 | 2 | 3 | 0 | 0 | 3 | 0 | 0 | 15 |

|                                                                                                                                                         |          |    |   |   |    |   |   |   |   |   |   |   |   |   |    |
|---------------------------------------------------------------------------------------------------------------------------------------------------------|----------|----|---|---|----|---|---|---|---|---|---|---|---|---|----|
| Intra-articular injection of an autologous preparation rich in growth factors for the treatment of knee OA: a retrospective cohort study                | Sanchez  | 7  | 0 | 7 | 10 | 5 | 2 | 2 | 3 | 0 | 3 | 3 | 0 | 0 | 29 |
| Transplantation of marrow-derived mesenchymal stem cells and platelet-rich plasma during distraction osteogenesis - a preliminary result of three cases | Kitoh    | 0  | 0 | 7 | 0  | 5 | 0 | 0 | 3 | 0 | 0 | 3 | 0 | 0 | 12 |
| Platelet-rich plasma intra-articular injections for cartilage degeneration and osteoarthritis: single- versus double-spinning approach                  | Filardo  | 10 | 2 | 7 | 10 | 5 | 2 | 2 | 3 | 0 | 3 | 3 | 0 | 0 | 34 |
| Platelet-rich plasma vs hyaluronic acid to treat knee degenerative pathology: study design and preliminary results of a randomized controlled trial     | Filardo  | 10 | 2 | 7 | 15 | 5 | 2 | 2 | 3 | 0 | 3 | 3 | 0 | 0 | 39 |
| Treatment of Knee Joint Osteoarthritis with Autologous Platelet-Rich Plasma in Comparison with Hyaluronic Acid                                          | Spakova  | 10 | 0 | 7 | 15 | 5 | 2 | 2 | 3 | 0 | 3 | 3 | 0 | 0 | 37 |
| One-Year Follow-up of Platelet-Rich Plasma Treatment in Chronic Achilles Tendinopathy A Double-Blind Randomized Placebo-Controlled Trial                | de Jonge | 7  | 2 | 0 | 15 | 5 | 2 | 2 | 3 | 0 | 3 | 3 | 0 | 0 | 29 |
| Effectiveness of autologous preparation rich in growth factors for the treatment of chronic cutaneous ulcers                                            | Anitua   | 0  | 0 | 7 | 15 | 5 | 2 | 2 | 3 | 0 | 0 | 3 | 0 | 0 | 27 |
| Platelet-rich plasma: New clinical application A pilot study for treatment of jumper's knee                                                             | Kon      | 4  | 0 | 7 | 10 | 5 | 2 | 2 | 3 | 0 | 3 | 3 | 0 | 0 | 26 |
