# Supplementary material for: The Top 100 Most Cited Articles on Platelet-Rich Plasma Use in Regenerative Medicine—A Bibliometric Analysis—From the ESSKA Orthobiologic Initiative
Source: MDPI journal article supplement (doi:10.3390/bioengineering9100580), 2022-10-19
Supplement: s1 [file s1]

**Table S1.** Characteristics of the top-cited meta-analyses (level of evidence), preclinical studies (study design and characterization of platelet-rich plasma) and clinical studies (study design, level of evidence, Coleman methodology score (CMS) and characterization of platelet-rich plasma).

| Rank<br>(according<br>to the total<br>number of<br>citations) | Paper                                                                                                                                                                                                                                                                   | Article<br>type      | Study<br>Design                   | Level of<br>Evidence | CMS | Characteri-<br>zation of<br>PRP | Parameters |     |     |           |
|---------------------------------------------------------------|-------------------------------------------------------------------------------------------------------------------------------------------------------------------------------------------------------------------------------------------------------------------------|----------------------|-----------------------------------|----------------------|-----|---------------------------------|------------|-----|-----|-----------|
|                                                               |                                                                                                                                                                                                                                                                         |                      |                                   |                      |     |                                 | PLT        | WBC | RBC | ≥ 1<br>GF |
| 1                                                             | Marx RE, Carlson ER, Eichstaedt RM, Schimmele SR, Strauss JE, Georgeff KR. Platelet-rich plasma: Growth factor enhancement for bone grafts. <i>Oral Surg Oral Med Oral Pathol Oral Radiol Endod.</i> 1998;85(6):638-646. doi:10.1016/s1079-2104(98)90029-4              | Clinical<br>study    | Randomized<br>controlled<br>trial | 2                    | 39  | Incomplete                      | Yes        | No  | No  | Yes       |
| 5                                                             | Eppley BL, Woodell JE, Higgins J. Platelet quantification and growth factor analysis from platelet-rich plasma: implications for wound healing. <i>Plast Reconstr Surg.</i> 2004;114(6):1502-1508. doi:10.1097/01.prs.0000138251.07040.5                                | Preclinical<br>study | <i>In vitro</i>                   | NA                   | NA  | Complete                        | Yes        | Yes | Yes | Yes       |
| 7                                                             | Anitua E. Plasma rich in growth factors: preliminary results of use in the preparation of future sites for implants. <i>Int J Oral Maxillofac Implants.</i> 1999;14(4):529-535.                                                                                         | Clinical<br>study    | Randomized<br>controlled<br>trial | 2                    | 31  | Incomplete                      | Yes        | No  | No  | No        |
| 8                                                             | de Vos RJ, Weir A, van Schie HT, et al. Platelet-rich plasma injection for chronic Achilles tendinopathy: a randomized controlled trial. <i>JAMA.</i> 2010;303(2):144-149. doi:10.1001/jama.2009.1986                                                                   | Clinical<br>study    | Randomized<br>controlled<br>trial | 2                    | 27  | Absence                         | No         | No  | No  | No        |
| 10                                                            | Weibrich G, Kleis WK, Hafner G, Hitzler WE. Growth factor levels in platelet-rich plasma and correlations with donor age, sex, and platelet count. <i>J Craniomaxillofac Surg.</i> 2002;30(2):97-102. doi:10.1054/jcms.2002.0285                                        | Preclinical<br>study | <i>In vitro</i>                   | NA                   | NA  | Incomplete                      | Yes        | No  | No  | Yes       |
| 11                                                            | Weibrich G, Hansen T, Kleis W, Buch R, Hitzler WE. Effect of platelet concentration in platelet-rich plasma on peri-implant bone regeneration. <i>Bone.</i> 2004;34(4):665-671. doi:10.1016/j.bone.2003.12.010                                                          | Preclinical<br>study | <i>In vivo</i>                    | NA                   | NA  | Incomplete                      | Yes        | No  | No  | No        |
| 12                                                            | Patel S, Dhillon MS, Aggarwal S, Marwaha N, Jain A. Treatment with platelet-rich plasma is more effective than placebo for knee osteoarthritis: a prospective, double-blind, randomized trial. <i>Am J Sports Med.</i> 2013;41(2):356-364. doi:10.1177/0363546512471299 | Clinical<br>study    | Randomized<br>controlled<br>trial | 1                    | 37  | Incomplete                      | Yes        | Yes | No  | No        |
| 16                                                            | Anitua E, Andía I, Sanchez M, et al. Autologous preparations rich in growth factors promote proliferation and induce VEGF and HGF production by human tendon cells in                                                                                                   | Preclinical<br>study | <i>In vitro</i>                   | NA                   | NA  | Incomplete                      | Yes        | No  | No  | Yes       |

culture. *J Orthop Res.* 2005;23(2):281-286. doi:10.1016/j.orthres.2004.08.015

|    |                                                                                                                                                                                                                                                                                              |                   |                                  |    |    |            |     |     |     |     |
|----|----------------------------------------------------------------------------------------------------------------------------------------------------------------------------------------------------------------------------------------------------------------------------------------------|-------------------|----------------------------------|----|----|------------|-----|-----|-----|-----|
| 18 | Kon E, Buda R, Filardo G, et al. Platelet-rich plasma: intra-articular knee injections produced favorable results on degenerative cartilage lesions. <i>Knee Surg Sports Traumatol Arthrosc.</i> 2010;18(4):472-479. doi:10.1007/s00167-009-0940-8                                           | Clinical study    | Case-series                      | 4  | 24 | Incomplete | Yes | No  | No  | No  |
| 21 | Landesberg R, Roy M, Glickman RS. Quantification of growth factor levels using a simplified method of platelet-rich plasma gel preparation. <i>J Oral Maxillofac Surg.</i> 2000;58(3):297-301. doi:10.1016/s0278-2391(00)90058-2                                                             | Preclinical study | <i>In vitro</i>                  | NA | NA | Incomplete | Yes | No  | No  | No  |
| 22 | Kon E, Mandelbaum B, Buda R, et al. Platelet-rich plasma intra-articular injection versus hyaluronic acid viscosupplementation as treatments for cartilage pathology: from early degeneration to osteoarthritis. <i>Arthroscopy.</i> 2011;27(11):1490-1501. doi:10.1016/j.arthro.2011.05.011 | Clinical study    | Non-randomized controlled cohort | 3  | 32 | Incomplete | Yes | No  | No  | No  |
| 24 | El-Sharkawy H, Kantarci A, Deady J, et al. Platelet-rich plasma: growth factors and pro- and anti-inflammatory properties. <i>J Periodontol.</i> 2007;78(4):661-669. doi:10.1902/jop.2007.060302                                                                                             | Preclinical study | <i>In vitro</i>                  | NA | NA | Incomplete | Yes | No  | No  | Yes |
| 25 | Man D, Plosker H, Winland-Brown JE. The use of autologous platelet-rich plasma (platelet gel) and autologous platelet-poor plasma (fibrin glue) in cosmetic surgery. <i>Plast Reconstr Surg.</i> 2001;107(1):229-239. doi:10.1097/00006534-200101000-00037                                   | Clinical study    | Case-series                      | 4  | 9  | Absence    | No  | No  | No  | No  |
| 26 | Castillo TN, Pouliot MA, Kim HJ, Drago J. Comparison of growth factor and platelet concentration from commercial platelet-rich plasma separation systems. <i>Am J Sports Med.</i> 2011;39(2):266-271. doi:10.1177/0363546510387517                                                           | Preclinical study | <i>In vitro</i>                  | NA | NA | Complete   | Yes | Yes | Yes | Yes |
| 27 | Lucarelli E, Beccheroni A, Donati D, et al. Platelet-derived growth factors enhance proliferation of human stromal stem cells. <i>Biomaterials.</i> 2003;24(18):3095-3100. doi:10.1016/s0142-9612(03)00114-5                                                                                 | Preclinical study | <i>In vitro</i>                  | NA | NA | Incomplete | Yes | No  | No  | No  |
| 28 | Amable PR, Carias RB, Teixeira MV, et al. Platelet-rich plasma preparation for regenerative medicine: optimization and quantification of cytokines and growth factors. <i>Stem Cell Res Ther.</i> 2013;4(3):67. Published 2013 Jun 7. doi:10.1186/scrt218                                    | Preclinical study | <i>In vitro</i>                  | NA | NA | Complete   | Yes | Yes | Yes | Yes |

|    |                                                                                                                                                                                                                                                                                                                    |                   |                             |    |    |            |     |     |    |     |
|----|--------------------------------------------------------------------------------------------------------------------------------------------------------------------------------------------------------------------------------------------------------------------------------------------------------------------|-------------------|-----------------------------|----|----|------------|-----|-----|----|-----|
| 30 | Castricini R, Longo UG, De Benedetto M, et al. Platelet-rich plasma augmentation for arthroscopic rotator cuff repair: a randomized controlled trial. <i>Am J Sports Med.</i> 2011;39(2):258-265. doi:10.1177/0363546510390780                                                                                     | Clinical study    | Randomized controlled trial | 1  | 32 | Absence    | No  | No  | No | No  |
| 31 | Graziani F, Ivanovski S, Cei S, Ducci F, Tonetti M, Gabriele M. The in vitro effect of different PRP concentrations on osteoblasts and fibroblasts. <i>Clin Oral Implants Res.</i> 2006;17(2):212-219. doi:10.1111/j.1600-0501.2005.01203.x                                                                        | Preclinical study | <i>In vitro</i>             | NA | NA | Incomplete | Yes | No  | No | No  |
| 32 | He L, Lin Y, Hu X, Zhang Y, Wu H. A comparative study of platelet-rich fibrin (PRF) and platelet-rich plasma (PRP) on the effect of proliferation and differentiation of rat osteoblasts in vitro. <i>Oral Surg Oral Med Oral Pathol Oral Radiol Endod.</i> 2009;108(5):707-713. doi:10.1016/j.tripleo.2009.06.044 | Preclinical study | <i>In vitro</i>             | NA | NA | Incomplete | Yes | No  | No | Yes |
| 33 | Crovetti G, Martinelli G, Issi M, et al. Platelet gel for healing cutaneous chronic wounds. <i>Transfus Apher Sci.</i> 2004;30(2):145-151. doi:10.1016/j.transci.2004.01.004                                                                                                                                       | Clinical study    | Case-series                 | 4  | 16 | Incomplete | Yes | Yes | No | No  |
| 35 | Okuda K, Kawase T, Momose M, et al. Platelet-rich plasma contains high levels of platelet-derived growth factor and transforming growth factor-beta and modulates the proliferation of periodontally related cells in vitro. <i>J Periodontol.</i> 2003;74(6):849-857. doi:10.1902/jop.2003.74.6.849               | Preclinical study | <i>In vitro</i>             | NA | NA | Incomplete | Yes | No  | No | Yes |
| 36 | Sundman EA, Cole BJ, Fortier LA. Growth factor and catabolic cytokine concentrations are influenced by the cellular composition of platelet-rich plasma. <i>Am J Sports Med.</i> 2011;39(10):2135-2140. doi:10.1177/0363546511417792                                                                               | Preclinical study | <i>In vitro</i>             | NA | NA | Complete   | Yes | Yes | No | Yes |
| 37 | Schnabel LV, Mohammed HO, Miller BJ, et al. Platelet rich plasma (PRP) enhances anabolic gene expression patterns in flexor digitorum superficialis tendons. <i>J Orthop Res.</i> 2007;25(2):230-240. doi:10.1002/jor.20278                                                                                        | Preclinical study | <i>In vitro</i>             | NA | NA | Incomplete | Yes | No  | No | Yes |
| 38 | Bendinelli P, Matteucci E, Dogliotti G, et al. Molecular basis of anti-inflammatory action of platelet-rich plasma on human chondrocytes: mechanisms of NF- $\kappa$ B inhibition via HGF. <i>J Cell Physiol.</i> 2010;225(3):757-766. doi:10.1002/jcp.22274                                                       | Preclinical study | <i>In vitro</i>             | NA | NA | Incomplete | Yes | Yes | No | Yes |
| 39 | Mishra A, Tummala P, King A, et al. Buffered platelet-rich plasma enhances mesenchymal stem cell proliferation and chondrogenic differentiation. <i>Tissue Eng Part C Methods.</i> 2009;15(3):431-435. doi:10.1089/ten.tec.2008.0534                                                                               | Preclinical study | <i>In vitro</i>             | NA | NA | Absence    | No  | No  | No | No  |

|    |                                                                                                                                                                                                                                                                                      |                   |                             |    |    |            |     |     |     |     |
|----|--------------------------------------------------------------------------------------------------------------------------------------------------------------------------------------------------------------------------------------------------------------------------------------|-------------------|-----------------------------|----|----|------------|-----|-----|-----|-----|
| 40 | Mazzocca AD, McCarthy MB, Chowanec DM, et al. Platelet-rich plasma differs according to preparation method and human variability. <i>J Bone Joint Surg Am.</i> 2012;94(4):308-316. doi:10.2106/JBJS.K.00430                                                                          | Preclinical study | <i>In vitro</i>             | NA | NA | Complete   | Yes | Yes | Yes | Yes |
| 41 | Randelli P, Arrigoni P, Ragone V, Aliprandi A, Cabitza P. Platelet rich plasma in arthroscopic rotator cuff repair: a prospective RCT study, 2-year follow-up. <i>J Shoulder Elbow Surg.</i> 2011;20(4):518-528. doi:10.1016/j.jse.2011.02.008                                       | Clinical study    | Randomized controlled trial | 1  | 26 | Absence    | No  | No  | No  | No  |
| 42 | Akeda K, An HS, Okuma M, et al. Platelet-rich plasma stimulates porcine articular chondrocyte proliferation and matrix biosynthesis. <i>Osteoarthritis Cartilage.</i> 2006;14(12):1272-1280. doi:10.1016/j.joca.2006.05.008                                                          | Preclinical study | <i>In vitro</i>             | NA | NA | Incomplete | Yes | No  | No  | Yes |
| 43 | de Mos M, van der Windt AE, Jahr H, et al. Can platelet-rich plasma enhance tendon repair? A cell culture study. <i>Am J Sports Med.</i> 2008;36(6):1171-1178. doi:10.1177/0363546508314430                                                                                          | Preclinical study | <i>In vitro</i>             | NA | NA | Complete   | Yes | Yes | Yes | Yes |
| 44 | Driver VR, Hanft J, Fyelling CP, Beriou JM; Autologel Diabetic Foot Ulcer Study Group. A prospective, randomized, controlled trial of autologous platelet-rich plasma gel for the treatment of diabetic foot ulcers. <i>Ostomy Wound Manage.</i> 2006;52(6):.                        | Clinical study    | Randomized controlled trial | 1  | 30 | Absence    | No  | No  | No  | No  |
| 45 | Yamada Y, Ueda M, Naiki T, Takahashi M, Hata K, Nagasaka T. Autogenous injectable bone for regeneration with mesenchymal stem cells and platelet-rich plasma: tissue-engineered bone regeneration. <i>Tissue Eng.</i> 2004;10(5-6):955-964. doi:10.1089/1076327041348284             | Preclinical study | <i>In vivo</i>              | NA | NA | Incomplete | Yes | No  | No  | No  |
| 50 | Kassolis JD, Rosen PS, Reynolds MA. Alveolar ridge and sinus augmentation utilizing platelet-rich plasma in combination with freeze-dried bone allograft: case series. <i>J Periodontol.</i> 2000;71(10):1654-1661. doi:10.1902/jop.2000.71.10.1654                                  | Clinical study    | Case-series                 | 4  | 14 | Incomplete | Yes | No  | No  | No  |
| 51 | Fréchette JP, Martineau I, Gagnon G. Platelet-rich plasmas: growth factor content and roles in wound healing. <i>J Dent Res.</i> 2005;84(5):434-439. doi:10.1177/154405910508400507                                                                                                  | Preclinical study | <i>In vitro</i>             | NA | NA | Complete   | Yes | Yes | Yes | Yes |
| 52 | Kakudo N, Minakata T, Mitsui T, Kushida S, Notodihardjo FZ, Kusumoto K. Proliferation-promoting effect of platelet-rich plasma on human adipose-derived stem cells and human dermal fibroblasts. <i>Plast Reconstr Surg.</i> 2008;122(5):1352-1360. doi:10.1097/PRS.0b013e3181882046 | Preclinical study | <i>In vitro</i>             | NA | NA | Incomplete | Yes | No  | No  | Yes |

|    |                                                                                                                                                                                                                                                                                                                 |                   |                             |    |    |            |     |     |    |     |
|----|-----------------------------------------------------------------------------------------------------------------------------------------------------------------------------------------------------------------------------------------------------------------------------------------------------------------|-------------------|-----------------------------|----|----|------------|-----|-----|----|-----|
| 53 | Aghaloo TL, Moy PK, Freymiller EG. Investigation of platelet-rich plasma in rabbit cranial defects: A pilot study. <i>J Oral Maxillofac Surg.</i> 2002;60(10):1176-1181. doi:10.1053/joms.2002.34994                                                                                                            | Preclinical study | <i>In vivo</i>              | NA | NA | Incomplete | Yes | No  | No | No  |
| 54 | Filardo G, Kon E, Buda R, et al. Platelet-rich plasma intra-articular knee injections for the treatment of degenerative cartilage lesions and osteoarthritis. <i>Knee Surg Sports Traumatol Arthrosc.</i> 2011;19(4):528-535. doi:10.1007/s00167-010-1238-6                                                     | Clinical study    | Case-series                 | 4  | 24 | Incomplete | Yes | No  | No | No  |
| 55 | Niemeyer P, Fechner K, Milz S, et al. Comparison of mesenchymal stem cells from bone marrow and adipose tissue for bone regeneration in a critical size defect of the sheep tibia and the influence of platelet-rich plasma. <i>Biomaterials.</i> 2010;31(13):3572-3579. doi:10.1016/j.biomaterials.2010.01.085 | Preclinical study | <i>In vivo</i>              | NA | NA | Incomplete | Yes | Yes | No | Yes |
| 56 | McCarrel T, Fortier L. Temporal growth factor release from platelet-rich plasma, trehalose lyophilized platelets, and bone marrow aspirate and their effect on tendon and ligament gene expression. <i>J Orthop Res.</i> 2009;27(8):1033-1042. doi:10.1002/jor.20853                                            | Preclinical study | <i>In vitro</i>             | NA | NA | Incomplete | Yes | Yes | No | Yes |
| 58 | Ishida K, Kuroda R, Miwa M, et al. The regenerative effects of platelet-rich plasma on meniscal cells in vitro and its in vivo application with biodegradable gelatin hydrogel. <i>Tissue Eng.</i> 2007;13(5):1103-1112. doi:10.1089/ten.2006.0193                                                              | Preclinical study | <i>In vitro and in vivo</i> | NA | NA | Incomplete | Yes | No  | No | Yes |
| 59 | Sánchez M, Fiz N, Azofra J, et al. A randomized clinical trial evaluating plasma rich in growth factors (PRGF-Endoret) versus hyaluronic acid in the short-term treatment of symptomatic knee osteoarthritis. <i>Arthroscopy.</i> 2012;28(8):1070-1078. doi:10.1016/j.arthro.2012.05.011                        | Clinical study    | Randomized controlled trial | 1  | 30 | Absence    | No  | No  | No | No  |
| 61 | Murray MM, Spindler KP, Abreu E, et al. Collagen-platelet rich plasma hydrogel enhances primary repair of the porcine anterior cruciate ligament. <i>J Orthop Res.</i> 2007;25(1):81-91. doi:10.1002/jor.20282                                                                                                  | Preclinical study | <i>In vivo</i>              | NA | NA | Incomplete | Yes | No  | No | No  |
| 63 | Camargo PM, Lekovic V, Weinlaender M, Vasilic N, Madzarevic M, Kenney EB. Platelet-rich plasma and bovine porous bone mineral combined with guided tissue regeneration in the treatment of intrabony defects in humans. <i>J Periodontal Res.</i> 2002;37(4):300-306. doi:10.1034/j.1600-0765.2002.01001.x      | Clinical study    | Split-mouth design          | 4  | 15 | Absence    | No  | No  | No | No  |

|    |                                                                                                                                                                                                                                                                                               |                   |                                  |    |    |            |     |     |     |     |
|----|-----------------------------------------------------------------------------------------------------------------------------------------------------------------------------------------------------------------------------------------------------------------------------------------------|-------------------|----------------------------------|----|----|------------|-----|-----|-----|-----|
| 64 | Kobayashi E, Flückiger L, Fujioka-Kobayashi M, et al. Comparative release of growth factors from PRP, PRF, and advanced-PRF. <i>Clin Oral Investig.</i> 2016;20(9):2353-2360. doi:10.1007/s00784-016-1719-1                                                                                   | Preclinical study | <i>In vitro</i>                  | NA | NA | Incomplete | No  | No  | No  | Yes |
| 65 | Sánchez M, Anitua E, Azofra J, Aguirre JJ, Andia I. Intra-articular injection of an autologous preparation rich in growth factors for the treatment of knee OA: a retrospective cohort study. <i>Clin Exp Rheumatol.</i> 2008;26(5):910-913.                                                  | Clinical study    | Cohort study                     | 3  | 29 | Incomplete | Yes | Yes | No  | Yes |
| 66 | van Buul GM, Koevoet WL, Kops N, et al. Platelet-rich plasma releasate inhibits inflammatory processes in osteoarthritic chondrocytes. <i>Am J Sports Med.</i> 2011;39(11):2362-2370. doi:10.1177/0363546511419278                                                                            | Preclinical study | <i>In vitro</i>                  | NA | NA | Complete   | Yes | Yes | Yes | Yes |
| 67 | Kitoh H, Kitakoji T, Tsuchiya H, et al. Transplantation of marrow-derived mesenchymal stem cells and platelet-rich plasma during distraction osteogenesis--a preliminary result of three cases. <i>Bone.</i> 2004;35(4):892-898. doi:10.1016/j.bone.2004.06.013                               | Clinical study    | Case-series                      | 4  | 12 | Incomplete | Yes | No  | No  | No  |
| 68 | Filardo G, Kon E, Pereira Ruiz MT, et al. Platelet-rich plasma intra-articular injections for cartilage degeneration and osteoarthritis: single- versus double-spinning approach. <i>Knee Surg Sports Traumatol Arthrosc.</i> 2012;20(10):2082-2091. doi:10.1007/s00167-011-1837-x            | Clinical study    | Non-randomized controlled cohort | 2  | 34 | Incomplete | Yes | Yes | No  | No  |
| 69 | Filardo G, Kon E, Di Martino A, et al. Platelet-rich plasma vs hyaluronic acid to treat knee degenerative pathology: study design and preliminary results of a randomized controlled trial. <i>BMC Musculoskelet Disord.</i> 2012;13:229. Published 2012 Nov 23. doi:10.1186/1471-2474-13-229 | Clinical study    | Randomized controlled trial      | 2  | 39 | Incomplete | Yes | Yes | No  | No  |
| 70 | Spaková T, Rosocha J, Lacko M, Harvanová D, Gharaibeh A. Treatment of knee joint osteoarthritis with autologous platelet-rich plasma in comparison with hyaluronic acid. <i>Am J Phys Med Rehabil.</i> 2012;91(5):411-417. doi:10.1097/PHM.0b013e3182aab72                                    | Clinical study    | Randomized controlled trial      | 2  | 37 | Incomplete | Yes | Yes | Yes | No  |
| 71 | Wiltfang J, Kloss FR, Kessler P, et al. Effects of platelet-rich plasma on bone healing in combination with autogenous bone and bone substitutes in critical-size defects. An animal experiment. <i>Clin Oral Implants Res.</i> 2004;15(2):187-193. doi:10.1111/j.1600-0501.2004.00980.x      | Preclinical study | <i>In vivo</i>                   | NA | NA | Incomplete | Yes | Yes | No  | No  |
| 72 | de Jonge S, de Vos RJ, Weir A, et al. One-year follow-up of platelet-rich plasma treatment in chronic Achilles tendinopathy: a double-blind randomized placebo-controlled                                                                                                                     | Clinical study    | Randomized controlled trial      | 1  | 29 | Absence    | No  | No  | No  | No  |

trial. *Am J Sports Med.* 2011;39(8):1623-1629. doi:10.1177/0363546511404877

|    |                                                                                                                                                                                                                                                                                                           |                   |                                  |    |    |            |     |     |    |     |
|----|-----------------------------------------------------------------------------------------------------------------------------------------------------------------------------------------------------------------------------------------------------------------------------------------------------------|-------------------|----------------------------------|----|----|------------|-----|-----|----|-----|
| 73 | Anitua E, Aguirre JJ, Algorta J, et al. Effectiveness of autologous preparation rich in growth factors for the treatment of chronic cutaneous ulcers. <i>J Biomed Mater Res B Appl Biomater.</i> 2008;84(2):415-421. doi:10.1002/jbm.b.30886                                                              | Clinical study    | Randomized controlled trial      | 2  | 27 | Incomplete | Yes | Yes | No | Yes |
| 74 | Kon E, Filardo G, Delcogliano M, et al. Platelet-rich plasma: new clinical application: a pilot study for treatment of jumper's knee. <i>Injury.</i> 2009;40(6):598-603. doi:10.1016/j.injury.2008.11.026                                                                                                 | Clinical study    | Non-randomized controlled cohort | 3  | 26 | Incomplete | Yes | No  | No | No  |
| 75 | Froum SJ, Wallace SS, Tarnow DP, Cho SC. Effect of platelet-rich plasma on bone growth and osseointegration in human maxillary sinus grafts: three bilateral case reports. <i>Int J Periodontics Restorative Dent.</i> 2002;22(1):45-53.                                                                  | Clinical study    | Case-series                      | 4  | 5  | Absence    | No  | No  | No | No  |
| 77 | Xie X, Wang Y, Zhao C, et al. Comparative evaluation of MSCs from bone marrow and adipose tissue seeded in PRP-derived scaffold for cartilage regeneration. <i>Biomaterials.</i> 2012;33(29):7008-7018. doi:10.1016/j.biomaterials.2012.06.058                                                            | Preclinical study | <i>In vitro and in vivo</i>      | NA | NA | Incomplete | Yes | No  | No | No  |
| 78 | van den Dolder J, Mooren R, Vloon AP, Stoelinga PJ, Jansen JA. Platelet-rich plasma: quantification of growth factor levels and the effect on growth and differentiation of rat bone marrow cells. <i>Tissue Eng.</i> 2006;12(11):3067-3073. doi:10.1089/ten.2006.12.3067                                 | Preclinical study | <i>In vitro</i>                  | NA | NA | Incomplete | Yes | No  | No | Yes |
| 79 | Carter CA, Jolly DG, Worden CE Sr, Hendren DG, Kane CJ. Platelet-rich plasma gel promotes differentiation and regeneration during equine wound healing. <i>Exp Mol Pathol.</i> 2003;74(3):244-255. doi:10.1016/s0014-4800(03)00017-0                                                                      | Preclinical study | <i>In vivo</i>                   | NA | NA | Incomplete | Yes | No  | No | Yes |
| 80 | Kajikawa Y, Morihara T, Sakamoto H, et al. Platelet-rich plasma enhances the initial mobilization of circulation-derived cells for tendon healing. <i>J Cell Physiol.</i> 2008;215(3):837-845. doi:10.1002/jcp.21368                                                                                      | Preclinical study | <i>In vivo</i>                   | NA | NA | Incomplete | Yes | No  | No | Yes |
| 83 | Krogh TP, Fredberg U, Stengaard-Pedersen K, Christensen R, Jensen P, Ellingsen T. Treatment of lateral epicondylitis with platelet-rich plasma, glucocorticoid, or saline: a randomized, double-blind, placebo-controlled trial. <i>Am J Sports Med.</i> 2013;41(3):625-635. doi:10.1177/0363546512472975 | Clinical study    | Randomized controlled trial      | 1  | 27 | Absence    | No  | No  | No | No  |

|    |                                                                                                                                                                                                                                                                          |                   |                             |    |    |            |     |     |    |     |
|----|--------------------------------------------------------------------------------------------------------------------------------------------------------------------------------------------------------------------------------------------------------------------------|-------------------|-----------------------------|----|----|------------|-----|-----|----|-----|
| 84 | Sundman EA, Cole BJ, Karas V, et al. The anti-inflammatory and matrix restorative mechanisms of platelet-rich plasma in osteoarthritis. <i>Am J Sports Med.</i> 2014;42(1):35-41. doi:10.1177/0363546513507766                                                           | Preclinical study | <i>In vitro</i>             | NA | NA | Incomplete | Yes | Yes | No | No  |
| 85 | Murray MM, Spindler KP, Ballard P, Welch TP, Zurakowski D, Nanney LB. Enhanced histologic repair in a central wound in the anterior cruciate ligament with a collagen-platelet-rich plasma scaffold. <i>J Orthop Res.</i> 2007;25(8):1007-1017. doi:10.1002/jor.20367    | Preclinical study | <i>In vivo</i>              | NA | NA | Absence    | No  | No  | No | No  |
| 86 | Choi BH, Zhu SJ, Kim BY, Huh JY, Lee SH, Jung JH. Effect of platelet-rich plasma (PRP) concentration on the viability and proliferation of alveolar bone cells: an in vitro study. <i>Int J Oral Maxillofac Surg.</i> 2005;34(4):420-424. doi:10.1016/j.ijom.2004.10.018 | Preclinical study | <i>In vitro</i>             | NA | NA | Incomplete | Yes | No  | No | No  |
| 87 | Sheth U, Simunovic N, Klein G, et al. Efficacy of autologous platelet-rich plasma use for orthopaedic indications: a meta-analysis. <i>J Bone Joint Surg Am.</i> 2012;94(4):298-307. doi:10.2106/JBJS.K.00154                                                            | Meta-analysis     | NA                          | 2  | NA | NA         | NA  | NA  | NA | NA  |
| 88 | Filardo G, Di Matteo B, Di Martino A, et al. Platelet-Rich Plasma Intra-articular Knee Injections Show No Superiority Versus Viscosupplementation: A Randomized Controlled Trial. <i>Am J Sports Med.</i> 2015;43(7):1575-1582. doi:10.1177/0363546515582027             | Clinical study    | Randomized controlled trial | 1  | 39 | Incomplete | Yes | Yes | No | No  |
| 89 | Kawase T, Okuda K, Wolff LF, Yoshie H. Platelet-rich plasma-derived fibrin clot formation stimulates collagen synthesis in periodontal ligament and osteoblastic cells in vitro. <i>J Periodontol.</i> 2003;74(6):858-864. doi:10.1902/jop.2003.74.6.858                 | Preclinical study | <i>In vitro</i>             | NA | NA | Absence    | No  | No  | No | No  |
| 90 | Schmidmaier G, Herrmann S, Green J, et al. Quantitative assessment of growth factors in reaming aspirate, iliac crest, and platelet preparation. <i>Bone.</i> 2006;39(5):1156-1163. doi:10.1016/j.bone.2006.05.023                                                       | Preclinical study | <i>In vitro</i>             | NA | NA | Incomplete | No  | No  | No | Yes |
| 91 | Li ZJ, Choi HI, Choi DK, et al. Autologous platelet-rich plasma: a potential therapeutic tool for promoting hair growth. <i>Dermatol Surg.</i> 2012;38(7 Pt 1):1040-1046. doi:10.1111/j.1524-4725.2012.02394.x                                                           | Preclinical study | <i>In vitro and in vivo</i> | NA | NA | Incomplete | Yes | No  | No | No  |
| 92 | Virchenko O, Aspenberg P. How can one platelet injection after tendon injury lead to a stronger tendon after 4 weeks? Interplay between early regeneration and mechanical stimulation. <i>Acta Orthop.</i> 2006;77(5):806-812. doi:10.1080/17453670610013033             | Preclinical study | <i>In vivo</i>              | NA | NA | Incomplete | Yes | No  | No | No  |



|     |                                                                                                                                                                                                                                                                                                                                                                                  |                   |                 |    |    |            |     |     |    |     |
|-----|----------------------------------------------------------------------------------------------------------------------------------------------------------------------------------------------------------------------------------------------------------------------------------------------------------------------------------------------------------------------------------|-------------------|-----------------|----|----|------------|-----|-----|----|-----|
| 93  | Weibrich G, Kleis WK, Hafner G. Growth factor levels in the platelet-rich plasma produced by 2 different methods: curasan-type PRP kit versus PCCS PRP system. <i>Int J Oral Maxillofac Implants</i> . 2002;17(2):184-190.                                                                                                                                                       | Preclinical study | <i>In vitro</i> | NA | NA | Incomplete | Yes | Yes | No | Yes |
| 94  | Dohan Ehrenfest DM, Bielecki T, Jimbo R, et al. Do the fibrin architecture and leukocyte content influence the growth factor release of platelet concentrates? An evidence-based answer comparing a pure platelet-rich plasma (P-PRP) gel and a leukocyte- and platelet-rich fibrin (L-PRF). <i>Curr Pharm Biotechnol</i> . 2012;13(7):1145-1152. doi:10.2174/138920112800624382 | Preclinical study | <i>In vitro</i> | NA | NA | Incomplete | No  | No  | No | Yes |
| 96  | Anitua E, Sánchez M, Zalduendo MM, et al. Fibroblastic response to treatment with different preparations rich in growth factors. <i>Cell Prolif</i> . 2009;42(2):162-170. doi:10.1111/j.1365-2184.2009.00583.x                                                                                                                                                                   | Preclinical study | <i>In vitro</i> | NA | NA | Incomplete | Yes | Yes | No | Yes |
| 97  | Dai WL, Zhou AG, Zhang H, Zhang J. Efficacy of Platelet-Rich Plasma in the Treatment of Knee Osteoarthritis: A Meta-analysis of Randomized Controlled Trials. <i>Arthroscopy</i> . 2017;33(3):659-670.e1. doi:10.1016/j.arthro.2016.09.024                                                                                                                                       | Meta-analysis     | NA              | 1  | NA | NA         | NA  | NA  | NA | NA  |
| 98  | Riboh JC, Saltzman BM, Yanke AB, Fortier L, Cole BJ. Effect of Leukocyte Concentration on the Efficacy of Platelet-Rich Plasma in the Treatment of Knee Osteoarthritis. <i>Am J Sports Med</i> . 2016;44(3):792-800. doi:10.1177/0363546515580787                                                                                                                                | Meta-analysis     | NA              | 1  | NA | NA         | NA  | NA  | NA | NA  |
| 99  | Anitua E, Sánchez M, Nurden AT, et al. Platelet-released growth factors enhance the secretion of hyaluronic acid and induce hepatocyte growth factor production by synovial fibroblasts from arthritic patients. <i>Rheumatology (Oxford)</i> . 2007;46(12):1769-1772. doi:10.1093/rheumatology/kem234                                                                           | Preclinical study | <i>In vitro</i> | NA | NA | Incomplete | Yes | No  | No | Yes |
| 100 | Bosch G, van Schie HT, de Groot MW, et al. Effects of platelet-rich plasma on the quality of repair of mechanically induced core lesions in equine superficial digital flexor tendons: A placebo-controlled experimental study. <i>J Orthop Res</i> . 2010;28(2):211-217. doi:10.1002/jor.20980                                                                                  | Preclinical study | <i>In vivo</i>  | NA | NA | Incomplete | Yes | Yes | No | Yes |

NA: Not Applicable
